# Supplementary material for: Genetic variation architecture of mitochondrial genome reveals the differentiation in Korean landrace and weedy rice
Source: PubMed Central journal article supplement (PMC5335689; doi:10.1038/srep43327), 2017-03-03
Supplement: srep43327-s1.pdf [file srep43327-s1.pdf]

# **Genetic variation architecture of mitochondrial genome reveals the differentiation in Korean landrace and weedy rice**

Wei Tong <sup>1,2,\*</sup>, Qiang He <sup>1,\*</sup>, Yong-Jin Park <sup>1,3</sup>

<sup>1</sup> Department of Plant Resources, College of Industrial Science, Kongju National University, Yesan, 32439, Republic of Korea

<sup>2</sup> State Key Laboratory of Tea Plant Biology and Utilization, Anhui Agricultural University, Hefei, 230036, Peoples' Republic of China

<sup>3</sup> Center for crop genetic resource and breeding (CCGRB), Kongju National University, Cheonan, 31080, Republic of Korea

\* These authors contributed equally to this work

Correspondence should be addressed to Yong-Jin Park, E-mail: [yjpark@kongju.ac.kr](mailto:yjpark@kongju.ac.kr)

## Supplementary information

### Supplementary Figures

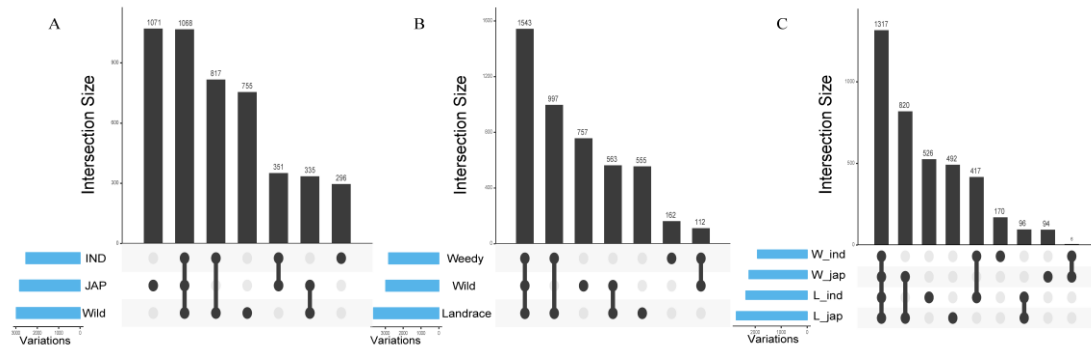

**Supplementary Fig 1.** Matrix layout for all intersections of different groups. Dark histogram indicated the specific variations in one group or intersected variations among two or more groups. Dark circles in the matrix indicate sets that are part of the intersection. The left set indicated the number of variations in each group. IND: *indica*, JAP: *japonica*, W/L\_ind: Weedy and landrace *indica*, W/L\_jap: Weedy and landrace *japonica* type.

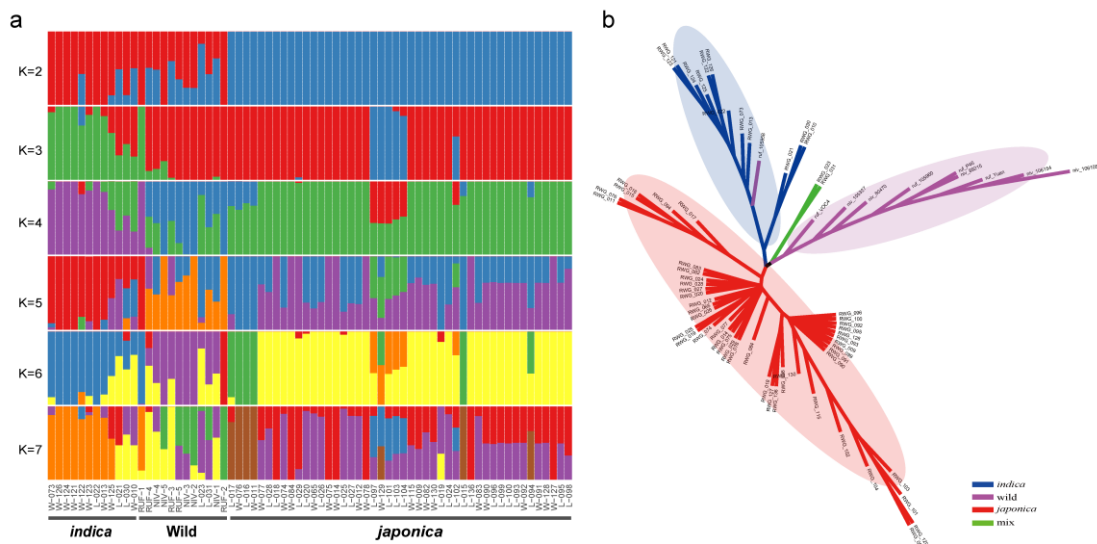

**Supplementary Fig 2.** Population structure and phylogenetic relationships of the collection using a filtered dataset. This dataset was carried out by removing the SNPs that harbored by the possibly mt insertion in nuclear genome. (a) Population structure clustering of the collection with increasing K value from 2 to 7. (b) A ML tree reveals the phylogenetic relationships of the collection. There main populations were identified. The *indica*, *japonica* and wild rice are marked with different colors.

## **Supplementary Tables**

**Supplementary Table 1.** Variations identified in 60 Korean landrace and weedy rice accessions. (In single separated file)

**Supplementary Table 2.** High quality Variations identified in 60 Korean landrace and weedy rice accessions. (In single separated file)

**Supplementary Table 3.** Regions with few or no variations in rice mitochondrial genome identified in this study.

**Supplementary Table 4.** Nucleotide diversity of mitochondrial genome in whole collection. (In single separated file)

**Supplementary Table 5.** Comparison of nucleotide diversity in landrace and weedy rice in mitochondrial genome level. (In single separated file)

**Supplementary Table 6.** Comparison of nucleotide diversity in landrace&weedy and wild rice in mitochondrial genome level. (In single separated file)

**Supplementary Table 7.** Comparison of nucleotide diversity in *indica*, *japonica* and wild rice in mitochondrial genome level. (In single separated file)

**Supplementary Table 8.** Comparison of nucleotide diversity in landrace or weedy *indica* and *japonica* rice in mitochondrial genome level. (In single separated file)

**Supplementary Table 9.** Information of the 60 Korean landrace and weedy accessions and 10 wild rice accession used in this study.

**Supplementary Table 1-2, 4-8 are in separated Excel files.**

**Supplementary Table 3.** Regions with few or no variations in rice mitochondrial genome identified in this study.

| NO | Start <sup>a</sup> | End <sup>b</sup> | Length/bp | No. of variations |
|----|--------------------|------------------|-----------|-------------------|
| 1  | 0                  | 43,760           | 43,760    | 0                 |
| 2  | 94,622             | 137,917          | 43,295    | 0                 |
| 3  | 143,763            | 167,120          | 23,357    | 3                 |
| 4  | 214,922            | 222,981          | 8,059     | 0                 |
| 5  | 273,948            | 285,414          | 11,466    | 1                 |
| 6  | 340,731            | 385,909          | 45,178    | 0                 |
| 7  | 409,456            | 416,118          | 6,662     | 0                 |
| 8  | 421,676            | 490,520          | 68,844    | 2                 |

<sup>a, b</sup> The positions are based on the reference of *O. sativa* L. ssp. *japonica* mitochondrial genome.

**Supplementary Table 9.** Information of the 60 Korean landrace and weedy accessions and 10 wild rice accession used in this study.

| No      | Accession name          | Origin | Type <sup>a</sup> | Subspecies <sup>b</sup> |
|---------|-------------------------|--------|-------------------|-------------------------|
| Acc-001 | Muando                  | Korea  | Landrace          | <i>japonica</i>         |
| Acc-002 | Dadajo                  | Korea  | Landrace          | <i>japonica</i>         |
| Acc-003 | OKCHEONG                | Korea  | Landrace          | <i>japonica</i>         |
| Acc-004 | Sando                   | Korea  | Landrace          | <i>japonica</i>         |
| Acc-005 | Batnarak                | Korea  | Landrace          | <i>japonica</i>         |
| Acc-006 | Orido                   | Korea  | Landrace          | <i>japonica</i>         |
| Acc-007 | Saducho                 | Korea  | Landrace          | <i>indica</i>           |
| Acc-008 | SEON                    | Korea  | Landrace          | <i>indica</i>           |
| Acc-009 | Hanyangjo               | Korea  | Landrace          | <i>admixture</i>        |
| Acc-010 | Inbujido                | Korea  | Landrace          | <i>japonica</i>         |
| Acc-011 | Beobpanhwa              | Korea  | Landrace          | <i>japonica</i>         |
| Acc-012 | JANMOCHAL               | Korea  | Landrace          | <i>japonica</i>         |
| Acc-013 | Pyodo                   | Korea  | Landrace          | <i>japonica</i>         |
| Acc-014 | YULJOJO                 | Korea  | Landrace          | <i>japonica</i>         |
| Acc-015 | Samgyeongjo             | Korea  | Landrace          | <i>japonica</i>         |
| Acc-016 | BAEKGOGNA               | Korea  | Landrace          | <i>indica</i>           |
| Acc-017 | MONDONCHALBYEO          | Korea  | Landrace          | <i>admixture</i>        |
| Acc-018 | Huindadak               | Korea  | Landrace          | <i>japonica</i>         |
| Acc-019 | Jotajo                  | Korea  | Landrace          | <i>japonica</i>         |
| Acc-020 | Pocheon Jangmang Mebyeo | Korea  | Landrace          | <i>japonica</i>         |
| Acc-021 | Dongo Byeo              | Korea  | Landrace          | <i>japonica</i>         |
| Acc-022 | Seorianjeunbaengi       | Korea  | Landrace          | <i>japonica</i>         |
| Acc-023 | Neul Byeo               | Korea  | Landrace          | <i>japonica</i>         |
| Acc-024 | Jwiippari Byeo          | Korea  | Landrace          | <i>japonica</i>         |
| Acc-025 | Jeongjonghwa            | Korea  | Landrace          | <i>japonica</i>         |
| Acc-026 | Sodujo                  | Korea  | Landrace          | <i>japonica</i>         |
| Acc-027 | Sando                   | Korea  | Landrace          | <i>japonica</i>         |
| Acc-028 | Bori Byeo               | Korea  | Landrace          | <i>japonica</i>         |
| Acc-029 | Naengjo                 | Korea  | Landrace          | <i>japonica</i>         |
| Acc-030 | Dudo                    | Korea  | Landrace          | <i>japonica</i>         |
| Acc-031 | Jejubukjeju-2002-99     | Korea  | Weedy             | <i>japonica</i>         |
| Acc-032 | Jejubukjeju-2002-171    | Korea  | Weedy             | <i>indica</i>           |
| Acc-033 | Jejubukjeju-2002-340    | Korea  | Weedy             | <i>japonica</i>         |
| Acc-034 | Jejubukjeju-2002-420    | Korea  | Weedy             | <i>japonica</i>         |
| Acc-035 | Jejubukjeju-2002-521    | Korea  | Weedy             | <i>indica</i>           |
| Acc-036 | Incheonkanghwasujip-16  | Korea  | Weedy             | <i>japonica</i>         |
| Acc-037 | Ssal Byeo 22            | Korea  | Weedy             | <i>japonica</i>         |
| Acc-038 | Cheongdo-donggok-4      | Korea  | Weedy             | <i>indica</i>           |
| Acc-039 | Golyeong-2              | Korea  | Weedy             | <i>japonica</i>         |
| Acc-040 | Golyeong-6              | Korea  | Weedy             | <i>japonica</i>         |

|         |                      |                 |       |                     |
|---------|----------------------|-----------------|-------|---------------------|
| Acc-041 | Danyang-7            | Korea           | Weedy | <i>japonica</i>     |
| Acc-042 | Danyang-38           | Korea           | Weedy | <i>japonica</i>     |
| Acc-043 | Hwaseong-5           | Korea           | Weedy | <i>japonica</i>     |
| Acc-044 | Syarebyeo-61-1-B     | Korea           | Weedy | <i>japonica</i>     |
| Acc-045 | Syalebyeo-94-1-B     | Korea           | Weedy | <i>japonica</i>     |
| Acc-046 | Syalebyeo-163-1-B    | Korea           | Weedy | <i>japonica</i>     |
| Acc-047 | Jejubukjeju-2002-115 | Korea           | Weedy | <i>japonica</i>     |
| Acc-048 | Jejubukjeju-2002-550 | Korea           | Weedy | <i>japonica</i>     |
| Acc-049 | Jejubukjeju-2002-561 | Korea           | Weedy | <i>japonica</i>     |
| Acc-050 | Ssalbyeo 16          | Korea           | Weedy | <i>japonica</i>     |
| Acc-051 | Chungdo 23           | Korea           | Weedy | <i>indica</i>       |
| Acc-052 | Chungdo Hwayang 12   | Korea           | Weedy | <i>indica</i>       |
| Acc-053 | Chungdo Hwayang 14   | Korea           | Weedy | <i>indica</i>       |
| Acc-054 | Sungju 3             | Korea           | Weedy | <i>indica</i>       |
| Acc-055 | Jangsung 1           | Korea           | Weedy | <i>indica</i>       |
| Acc-056 | Soonchun 5           | Korea           | Weedy | <i>indica</i>       |
| Acc-057 | Daegu Damti 6-2      | Korea           | Weedy | <i>japonica</i>     |
| Acc-058 | Guechang 15          | Korea           | Weedy | <i>japonica</i>     |
| Acc-059 | Danyang 9            | Korea           | Weedy | <i>japonica</i>     |
| Acc-060 | Chungsongaengmi 4    | Korea           | Weedy | <i>japonica</i>     |
| Acc-061 | IRGC 105327          | India           | Wild  | <i>O. nivara</i>    |
| Acc-062 | IRGC 106105          | India           | Wild  | <i>O. nivara</i>    |
| Acc-063 | IRGC 106154          | Vientiane, Laos | Wild  | <i>O. nivara</i>    |
| Acc-064 | IRGC 80470           | India           | Wild  | <i>O. nivara</i>    |
| Acc-065 | IRGC 89215           | Cambodia        | Wild  | <i>O. nivara</i>    |
| Acc-066 | IRGC 105958          | Indonesia       | Wild  | <i>O. rufipogon</i> |
| Acc-067 | IRGC 105960          | Bangladesh      | Wild  | <i>O. rufipogon</i> |
| Acc-068 | VOC4                 | Nepal           | Wild  | <i>O. rufipogon</i> |
| Acc-069 | P46                  | China           | Wild  | <i>O. rufipogon</i> |
| Acc-070 | Yuan 3-9             | China           | Wild  | <i>O. rufipogon</i> |

<sup>a</sup> The type was determined by PowerCore (Kim et al. 2007). <sup>b</sup> Defined by ADMIXTURE (Alexander et al. 2009) when K = 2 using nuclear genome SNP data.
